# Supplementary material for: The role of nickel–iron based layered double hydroxide on the crystallinity, electrochemical performance, and thermal and mechanical properties of the poly(ethylene-oxide) solid electrolyte
Source: Royal Society of Chemistry journal article supplement (doi:10.1039/d1nj04467b), 2021-01-01
Supplement: d1nj04467b1.pdf [file d1nj04467b1.pdf]

**The role of nickel-iron based layered double hydroxide on crystallinity, ion conductivity, thermal and mechanical properties on poly(ethylene-oxide) solid electrolyte**

Kuo Yang, Hao Su, Mingtao Ding, Ye Li, Bing Xue\* and Xiaopeng Gu\*

Key Laboratory of Automobile Materials, Ministry of Education and School of Materials Science and Engineering, Jilin University, Changchun 130022, PR China

E-mail addresses: xuebing2011@jlu.edu.cn (B. Xue); guxp@jlu.edu.cn (X. Gu)

## Synthesis of lithium montmorillonite (LM)

The montmorillonite and lithium chloride were added to distilled water at a mass ratio of 1: 2 to form a suspension by stirring. The ion exchange between the montmorillonite layers was performed by stirring at 60 °C for 24 h. After that, the suspension was centrifuged and the upper liquid was removed. Then, the precipitate was dried at 80 °C for 24 h after washing precipitate for 5 times. The LM powder was obtained after grinding and screening the dry precipitation with a 200 mesh sieve.

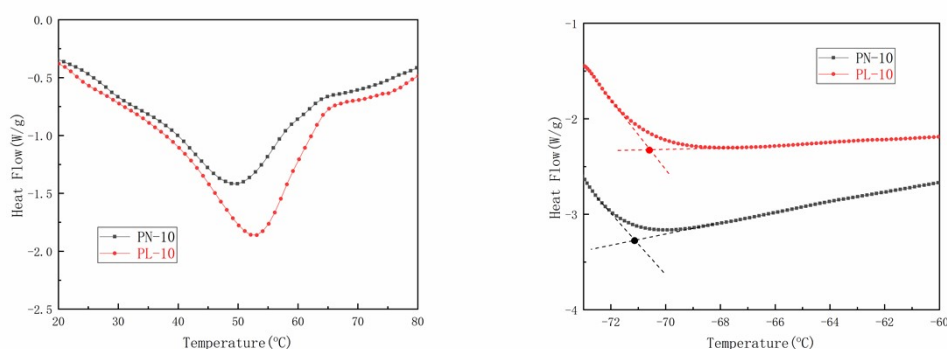

**Fig. S1.** DSC thermograms of PN-10 and PL-10

**Table S1.** Zeta potential of NILDH and lithium montmorillonite

| Sample                  | ZP (mV) |
|-------------------------|---------|
| NILDH                   | 9.89    |
| lithium montmorillonite | -14.6   |

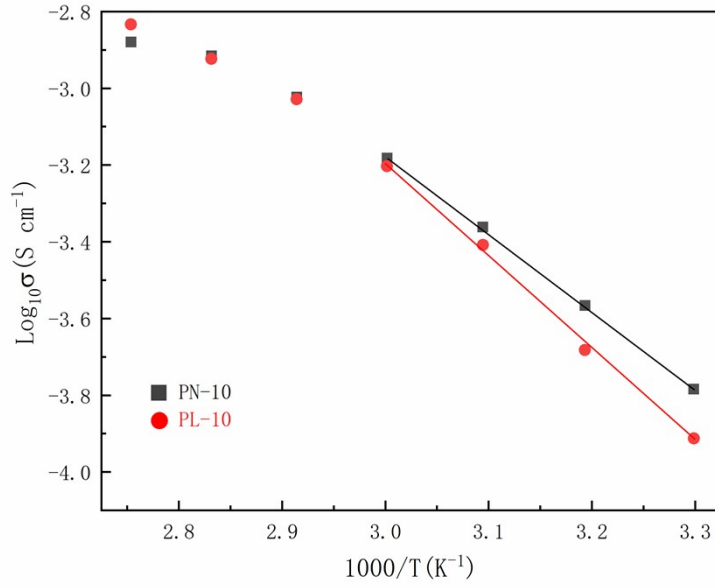

**Fig. S2.** The influence of temperature on ionic conductivity of PN-10 and PL-10

**Table S2.** The values of parameters for Equation S1 and the corresponding calculated values of lithium-ion transference number ( $t_{Li^+}$ ).

| Samples    | $I_0$<br>( $\mu A$ ) | $I_s$<br>( $\mu A$ ) | $R_i$<br>( $k\Omega$ ) | $R_f$<br>( $k\Omega$ ) | $R_0$<br>( $k\Omega$ ) | $R_s$<br>( $k\Omega$ ) | $\Delta V$<br>(mV) | $t_{Li^+}$ |
|------------|----------------------|----------------------|------------------------|------------------------|------------------------|------------------------|--------------------|------------|
| PEO/LiTFSI | 2.263                | 1.524                | 4.728                  | 5.189                  | 19.965                 | 21.212                 | 50                 | 0.20       |
| PN-10      | 4.910                | 3.725                | 0.874                  | 0.978                  | 9.757                  | 11.630                 | 50                 | 0.27       |

$$t_{Li^+} = \frac{I_s R_f [\Delta V - I_0 R_0]}{I_0 R_i [\Delta V - I_s R_s]} \quad (S1)$$

where  $I_0$  and  $I_s$  are the initial and steady-state current determined by the DC polarization, respectively;  $R_f$  and  $R_i$  are the initial and final resistances of the electrolytes;  $R_0$  and  $R_s$  are the interface resistance measured by AC impedance before

and after polarization;  $\Delta V$  is the DC potential applied on the cell.
